# Supplementary material for: Fabrication of laminated and coated Nafion 117 membranes for reduced mass transfer in microbial fuel cells
Source: Royal Society of Chemistry journal article supplement (doi:10.1039/c6ra02234k), 2016-01-01

## **Supporting Information**

### **Fabrication of laminated and coated Nafion 117 membranes for reduced mass transfer in microbial fuel cell**

Vikash Kumar, Piyush Kumar, Arpita Nandy, Patit P. Kundu\*

\*Advanced Polymer Laboratory, Department of Polymer Science and Technology, University of Calcutta, 92, A.P.C Road, Kolkata – 700009, India.

\*Corresponding author Tel.: +91 2350 1397; fax: +91 2352 5106. E-mail address: ppk923@yahoo.com (P.P. Kundu).

Fig S1. FT-IR spectra of pure and sulfonated PVdF membranes

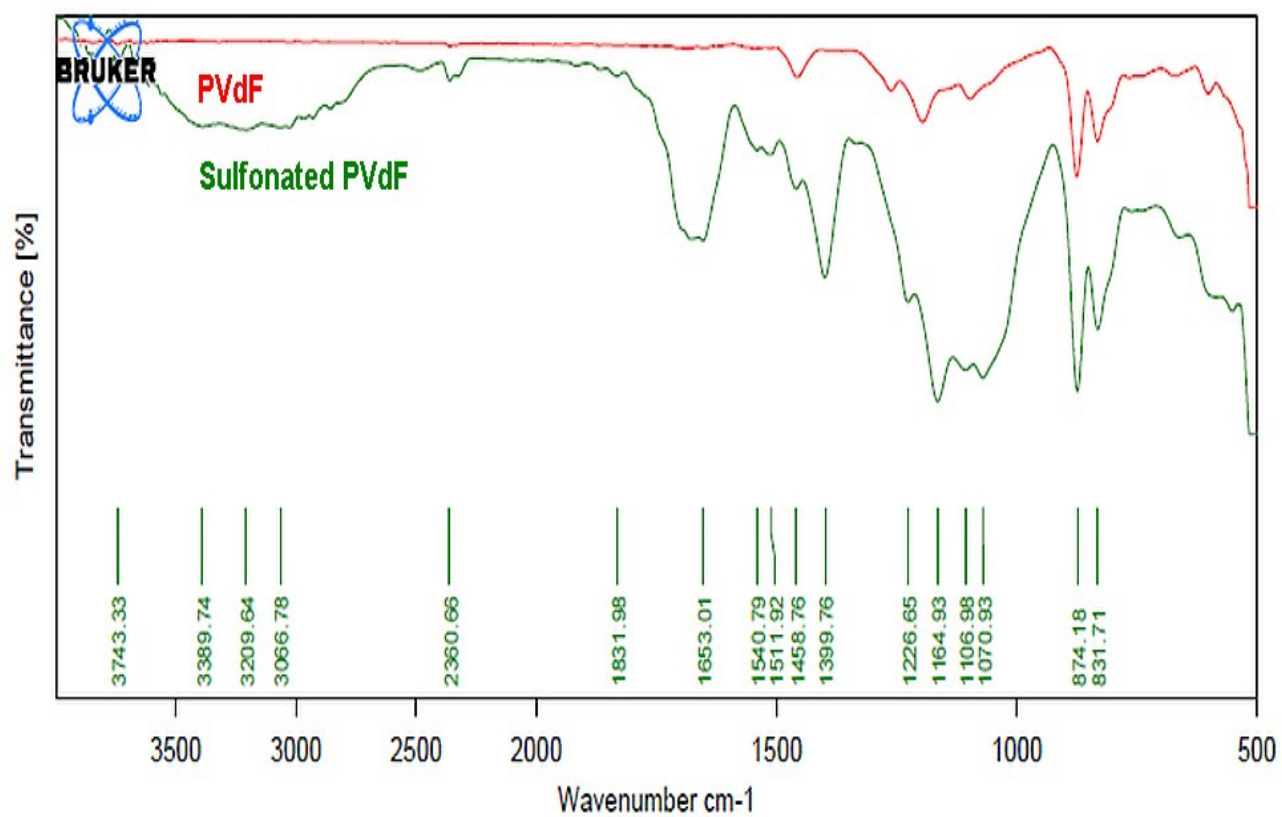

Fig S2. Equivalent circuit representing ohmic resistance ( $R_m$ )

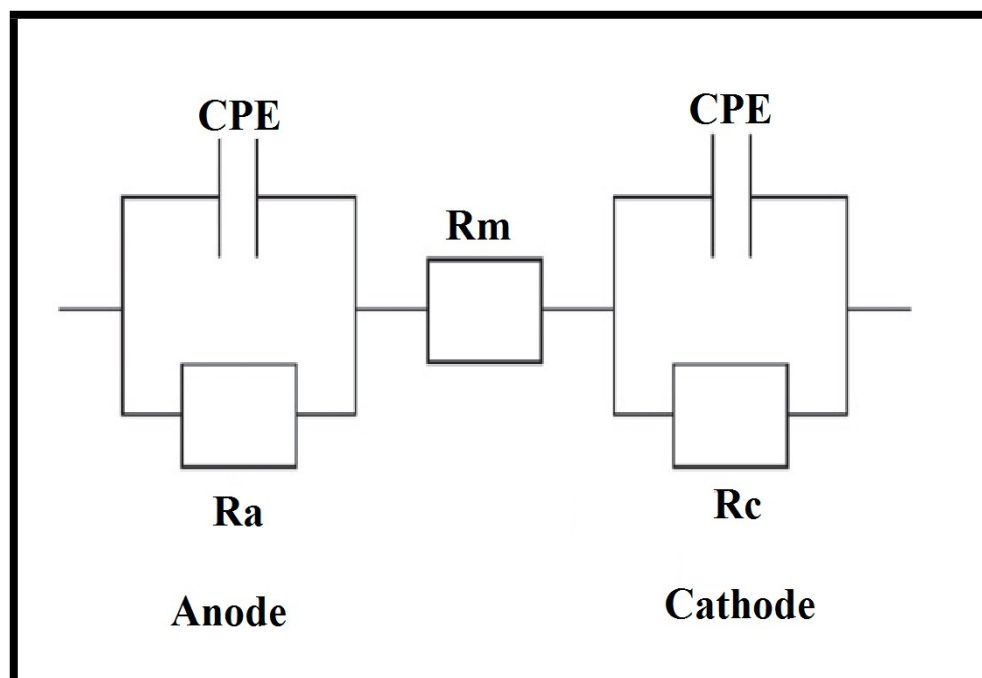

Fig S3. Cell performance at different resistances

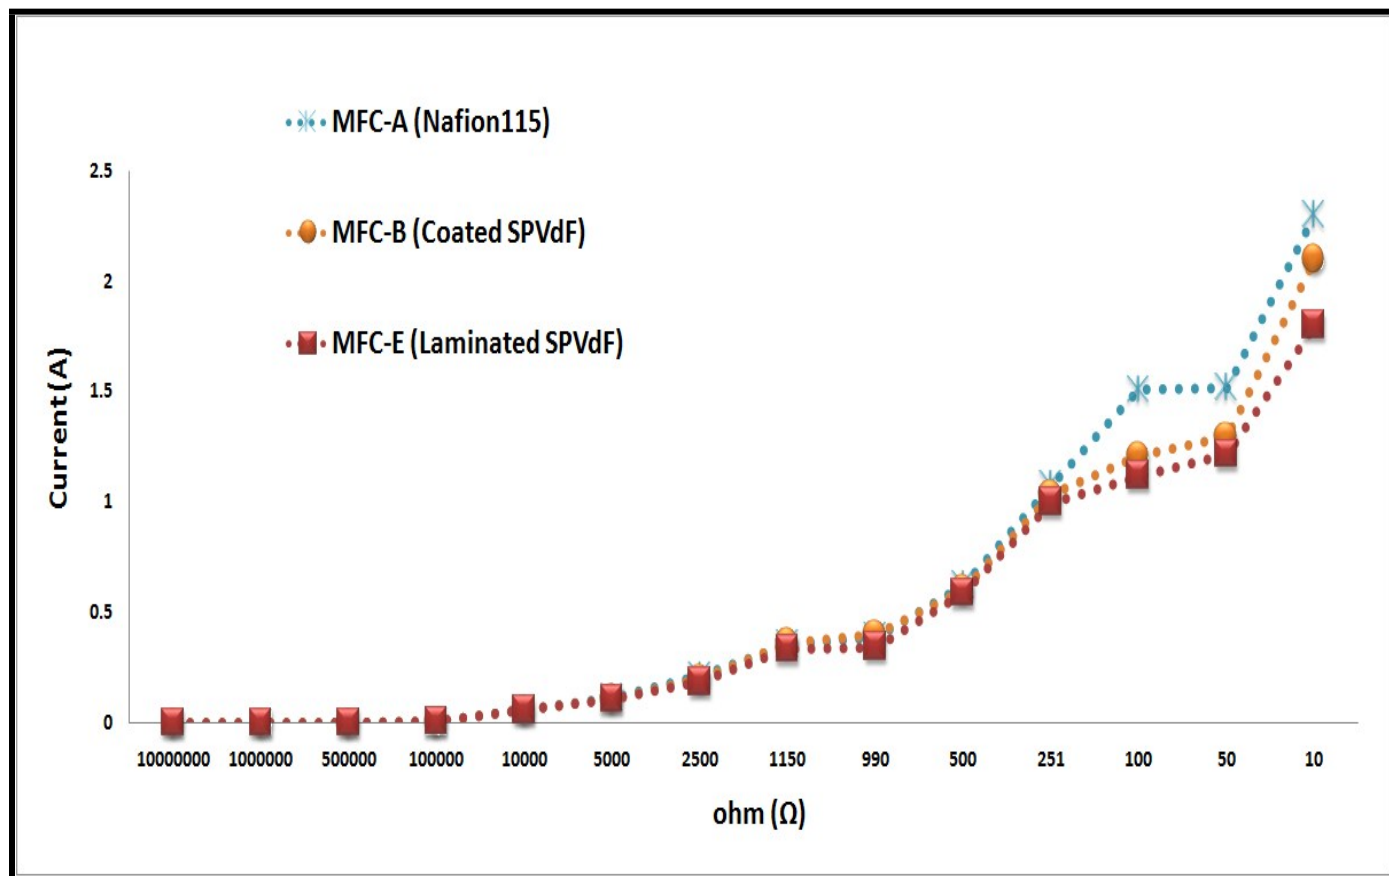

Table T1. A comparative study of MFCs in terms of power generation using different membranes

| <u>MFC Type</u>                          | <u>Electrodes</u> | <u>Used<br/>Membranes</u>                  | <u>Maximum<br/>Power density</u>                              | <u>References</u> |
|------------------------------------------|-------------------|--------------------------------------------|---------------------------------------------------------------|-------------------|
| Dual chamber with oxygen flow at cathode | Carbon papers     | Nafion 117                                 | 600 mWm <sup>-2</sup>                                         | 1                 |
| Air cathode MFC                          | Carbon Brush      | Glass fibers                               | 240±22 mWm <sup>-2</sup>                                      | 2                 |
|                                          | Carbon Mesh       | Coated Glass fibers                        | 230 ± 3.3 mWm <sup>-2</sup>                                   |                   |
| Air cathode MFC                          | Carbon papers     | Nafion 117                                 | 239.4 mWm <sup>-2</sup>                                       | 3                 |
| Air cathode MFC                          | Carbon papers     | SPEEK/PES                                  | 170 mWm <sup>-2</sup>                                         | 4                 |
| Dual chamber                             | Graphite Plates   | Fe3O4/PES nanocomposite                    | 20 mWm <sup>-2</sup>                                          | 5                 |
| Single chamber (tubular) MFC             | Carbon cloths     | GO-PVA-STA composite                       | 139 mWm <sup>-2</sup>                                         | 6                 |
| Air cathode MFC                          | Carbon cloths     | SPVDF coated/laminated Nafion 117 membrane | 446.45 ± 21 mWm <sup>-2</sup> / 413.79 ± 20 mWm <sup>-2</sup> | Present study     |

## References:

1. Prakash GKS, Viva FA, Bretschger O, Yang B, El-Naggar M, Nealson K. Inoculation procedures and characterization of membrane electrode assemblies for microbial fuel cells. J Power Sources 2010; 195:111–7.
2. Hays S, Zhang F, Logan BE. Performance of two different types of anodes in membrane electrode assembly microbial fuel cells for power generation from domestic wastewater. J Power Sources 2011; 196:8293–300.

3. Lu N, Zhou SG, Zhuang L, Zhang JT, Ni JR. Electricity generation from starch processing waste-water using microbial fuel cell technology. *Biochem Eng J* 2009; 43:246–51.
4. Lim, S. S.; Daud, W. R. W.; Md Jahim, J.; Ghasemi, M.; Chong, P. S.; Ismail, M. Sulfonated Poly(ether Ether Ketone)/poly(ether Sulfone) Composite Membranes as an Alternative Proton Exchange Membrane in Microbial Fuel Cells. *International Journal of Hydrogen Energy* 2012, 37, 11409–11424.
5. Rahimnejad, M.; Ghasemi, M.; Najafpour, G. D.; Ismail, M.; Mohammad, A. W.; Ghoreyshi, A. A.; Hassan, S. H. A. Synthesis, Characterization and Application Studies of Self-made Fe<sub>3</sub>O<sub>4</sub>/PES Nanocomposite Membranes in Microbial Fuel Cell. *Electrochimica Acta* **2012**, 85, 700–706.
6. Santimoy Khilari, Soumya Pandit, Makarand M. Ghangrekar, Debabrata Pradhan, Debabrata Das, Graphene oxide impregnated PVA-STA composite polymer electrolyte membrane separator for power generation in single chambered Microbial Fuel Cell. *Industrial & Engineering Chemistry Research* 2013, 52, 11597–11606.

Fig S4. Cyclic voltammograms of microbes

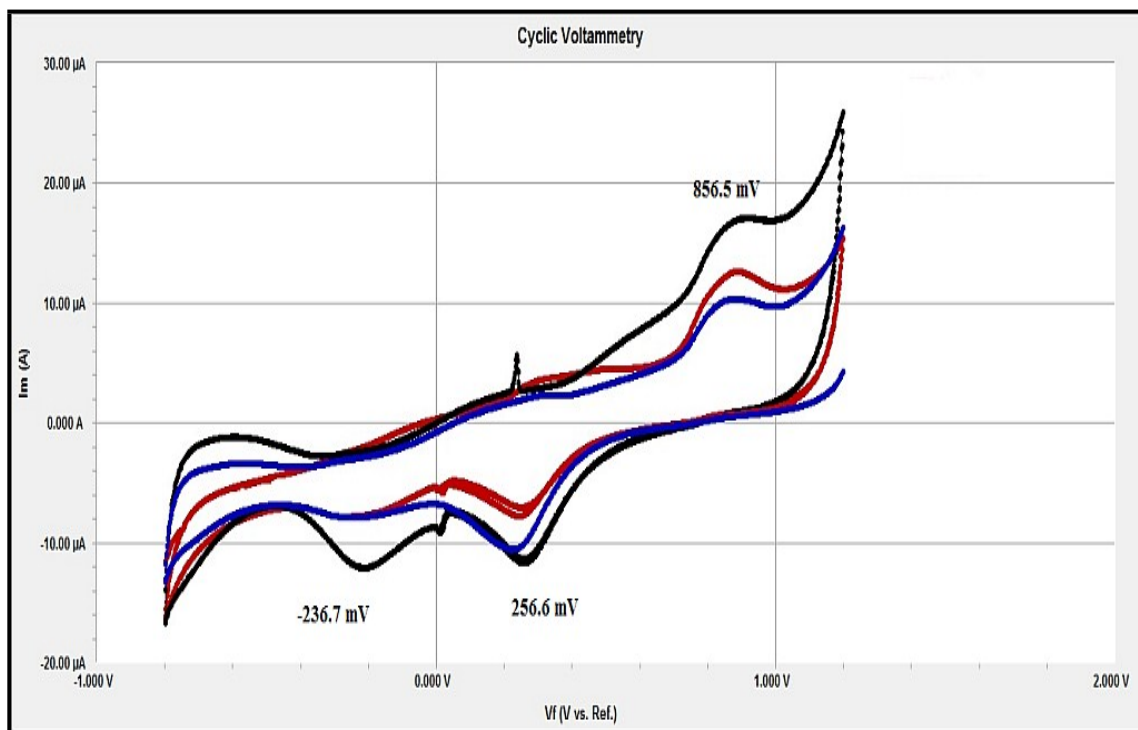

Electron transfer from biofilm to electrode indicated microbial oxidation, whereas reduction peaks corresponded towards microbial reduction (charge transfer from electrode to biofilm). This redox activity was attributed to the microbial cell surface proteins that evidently ensured its biocatalytic activity, resulting in subsequent substrate utilization from the employed *firmicutes* on repeated potential cycling.

Fig S5. Schematic illustration for proton conductivity measurement.

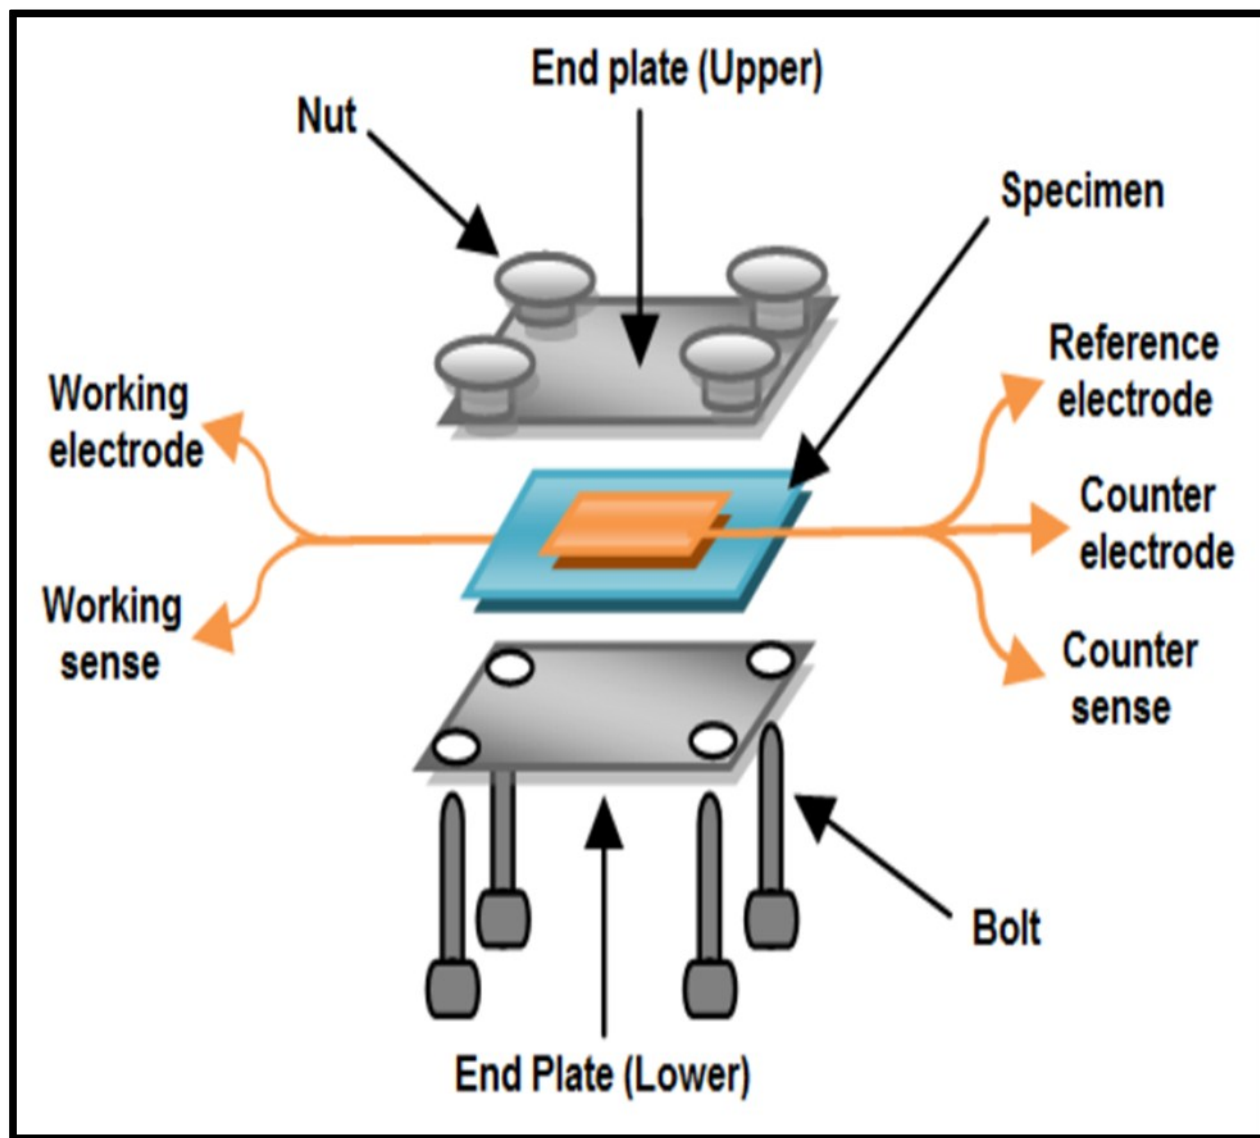



Fig S6. Membrane electrode assembly (MEA) in single chambered MFCs

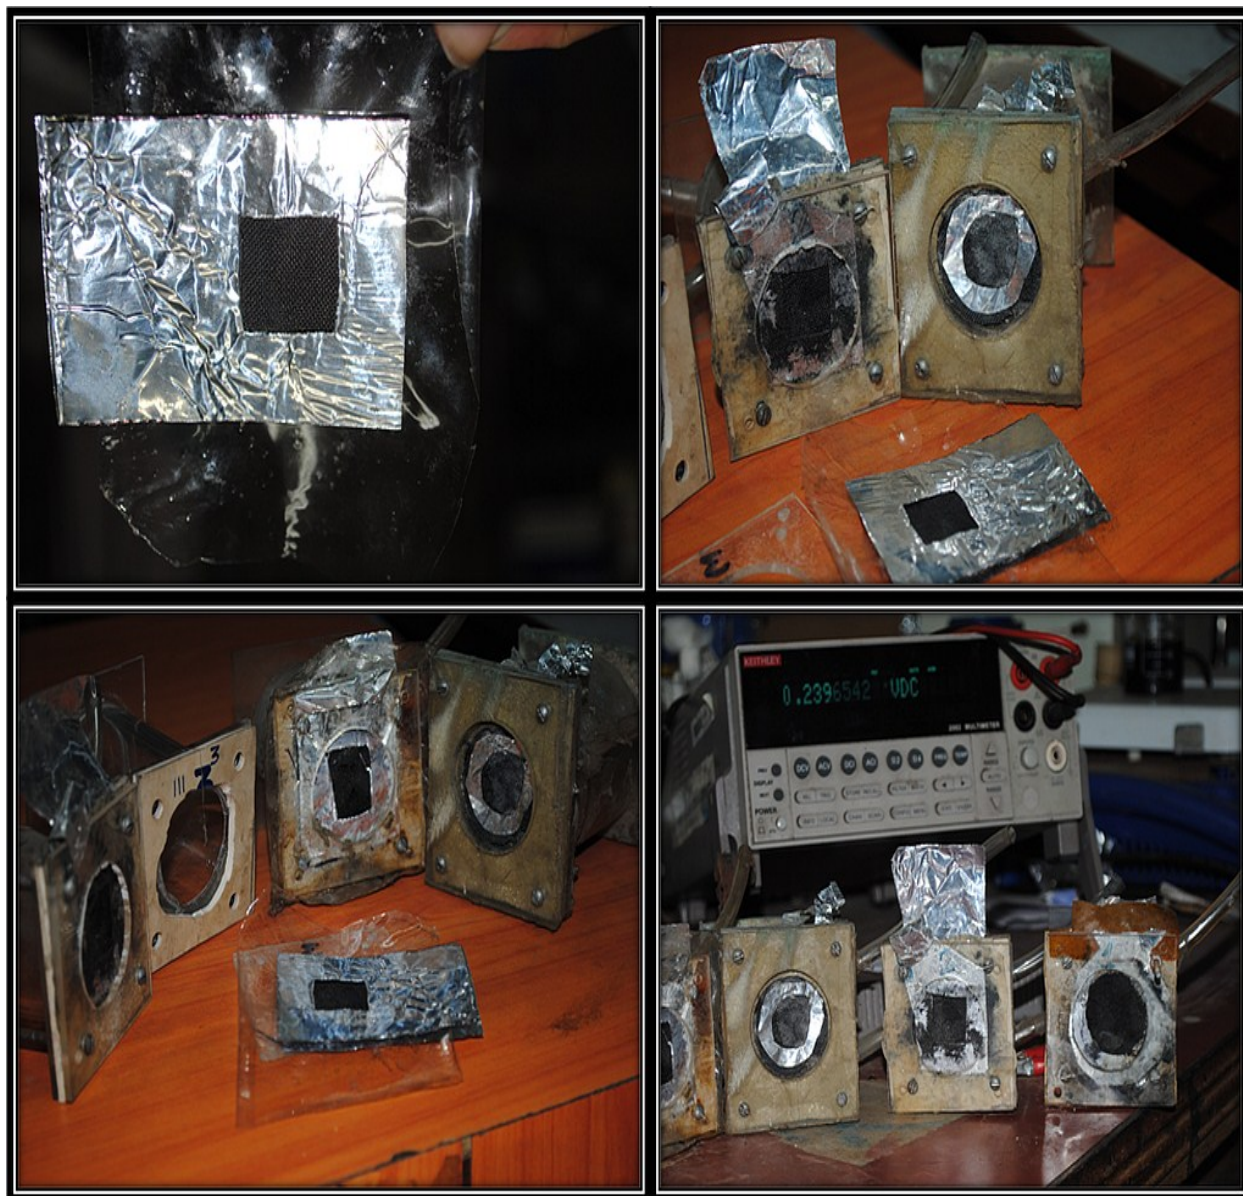

Supplement: c6ra02234k1.pdf [file c6ra02234k1.pdf]
